# Supplementary material for: Genome Assembly and Genetic Traits of the Pleuromutilin-Producer Clitopilus passeckerianus DSM1602
Source: MDPI journal article supplement (doi:10.3390/jof8080862), 2022-08-16
Supplement: s1 [file s1]

Supplementary Figures to:  
Genome assembly and genetic traits of the pleuromutilin-  
producer *Clitopilus passeckerianus* DSM1602

Thomas Schafhauser, Daniel Wibberg, Antonia Binder, Christian Rückert, Tobias Busche, Wolfgang Wohlleben  
and Jörn Kalinowski

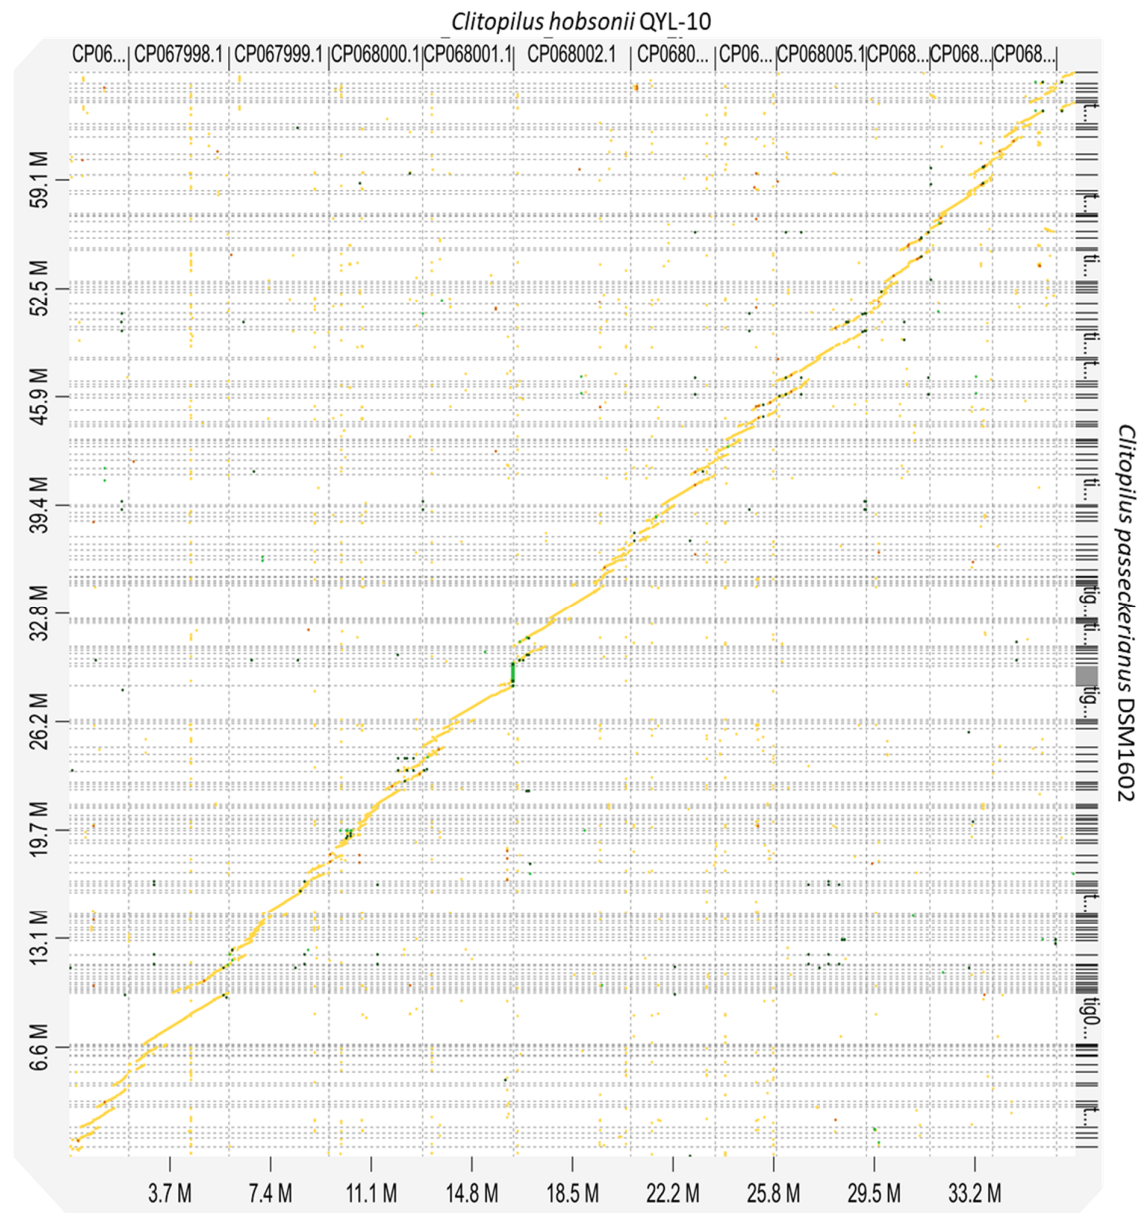

**Figure S1.** Macrosynteny plot between *C. passeckerianus* and *C. hobsonii*. Homologues sequence segments are plotted as small points according to their positions in the chromosomes of *C. hobsonii* (x-axis) and in the contigs of *C. passeckerianus* (y-axis). Larger homologous regions are displayed as yellow diagonal lines illustrating collinearity (= synteny) of the two sets of sequences. Accordingly, large parts of the contigs of *C. passeckerianus* are syntenic to chromosomes of *C. hobsonii*. Only very few regions are reversed complementary (displayed in green). Many parts of the *C. hobsonii* chromosomes are syntenic to







cloning vectors pBluescript and pBR322 are designated 1L (5'-CGGGCCCCCCTCGAGGTCGACGGTATCGATAAGCTTGAT-3'), 1R (5'-ATCGAATTCCTGCAGCCCCGGGGATCCACTAGTTCTAGAG-3'), 2L (5'-AAAATAGGCGTATCACGAGGCCCTTTCGTCTTCAAGAATT-3'), and 2R (5'-CCGGATCTGCATCGCAGGATGCTGCTGGCTACCCTGTGGA). Restriction sites for the type IIS endonucleases BmrI (5'-ACTGGNNNNN-3') and SapI (5'-GCTCTCNNNN-3') are draw as 'X' or 'Y'.

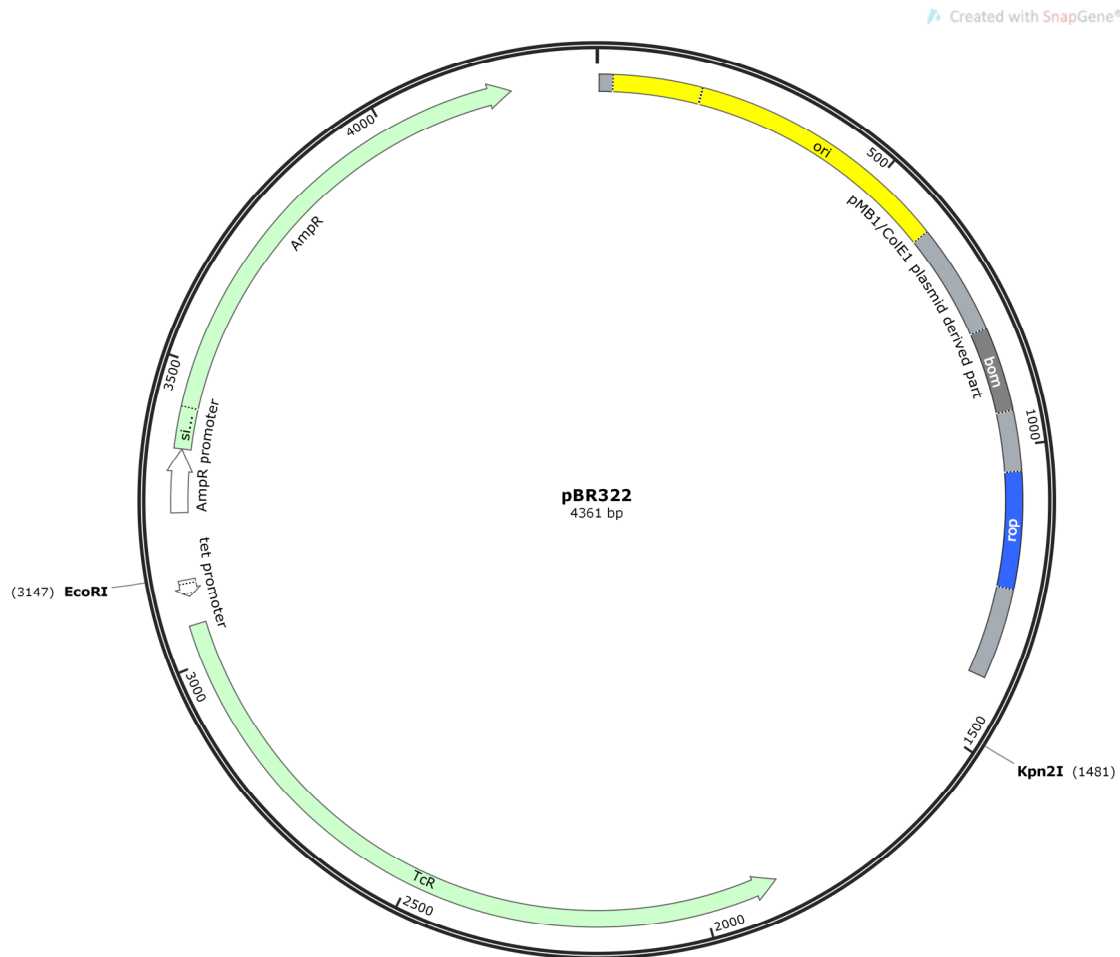

**Figure S3. Map of the vector pBR322.** AmpR: beta-lactamase gene; ori: high-copy-number ColE1/pMB1/pBR322/pUC origin of replication; bom: basis of mobility (relict from original plasmid), rop: gene coding for 'repression of priming'-protein that reduces plasmid copy number (--> ORF towards bom); TcR: gene coding for tetracycline efflux protein.
